# Supplementary material
Source: ML conference proceedings conference paper supplement (https://openreview.net/forum?id=HTLJptF7qM)

0.005 0.005 0.005 0.005 0.005 0.005 0.005 0.004 0.005 0.004

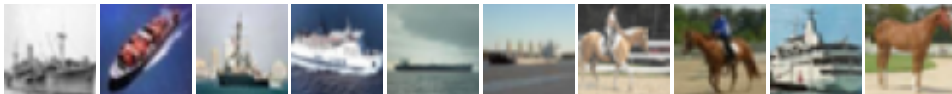

0.005 0.005 0.004 0.005 0.004 0.004 0.004 0.005 0.004 0.005

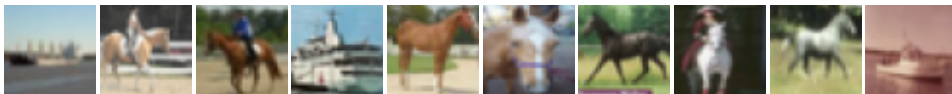

0.004 0.004 0.005 0.004 0.005 0.005 0.005 0.004 0.005 0.005

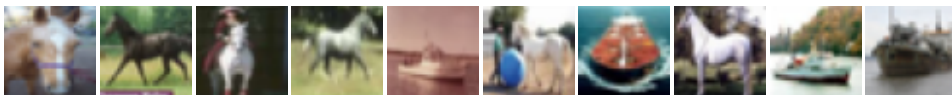

0.005 0.005 0.004 0.005 0.005 0.005 0.004 0.005 0.005 0.005

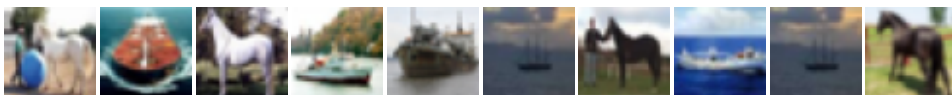

0.005 0.004 0.005 0.005 0.005 0.005 0.005 0.004 0.005 0.005

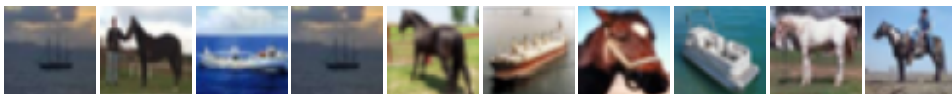

Supplement: supplementary_material [file attachment]

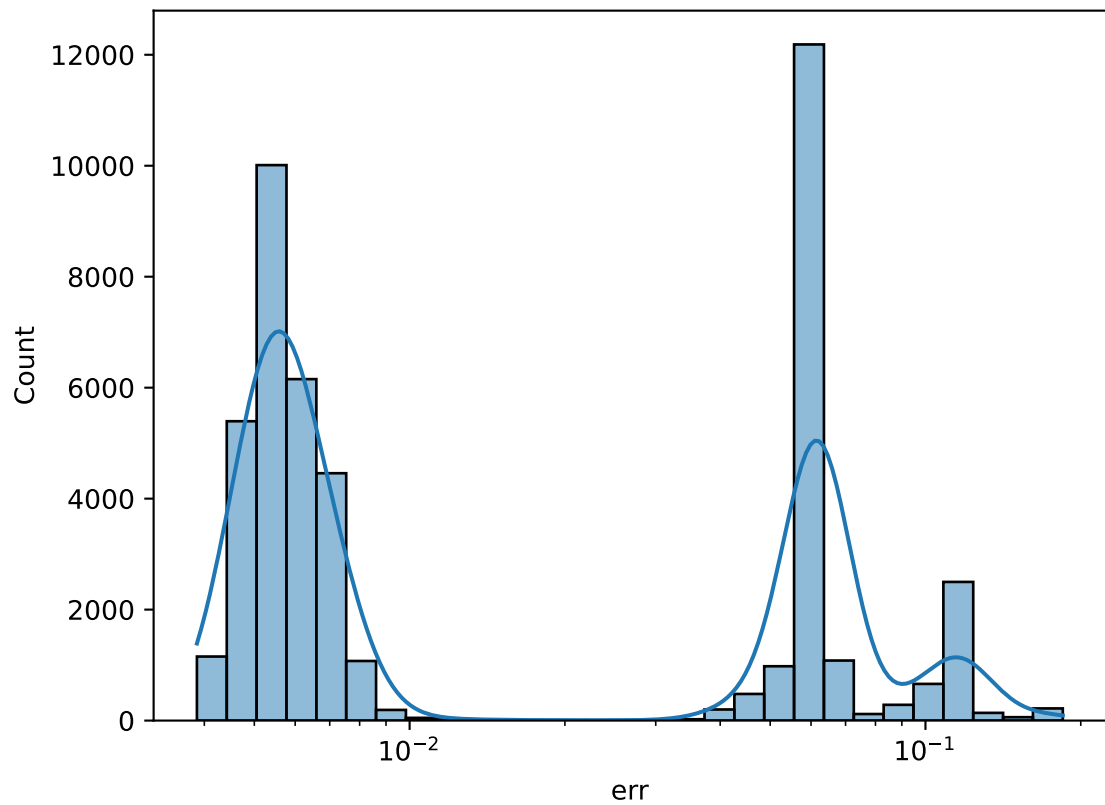

Supplement: supplementary_material [file attachment]

0.176 0.176 0.175 0.175 0.171 0.167 0.172 0.174 0.175 0.176

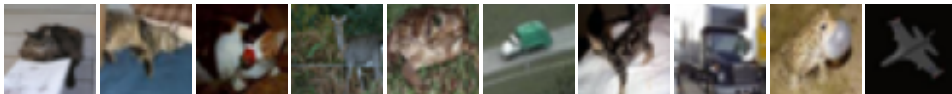

0.167 0.172 0.174 0.175 0.176 0.166 0.177 0.176 0.175 0.172

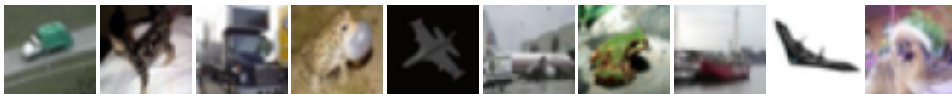

0.166 0.177 0.176 0.175 0.172 0.171 0.176 0.180 0.178 0.167

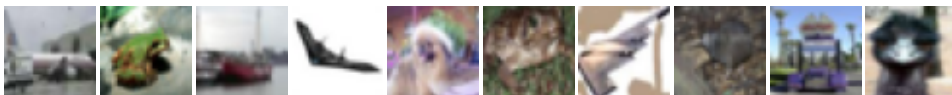

0.171 0.176 0.180 0.178 0.167 0.172 0.174 0.175 0.172 0.167

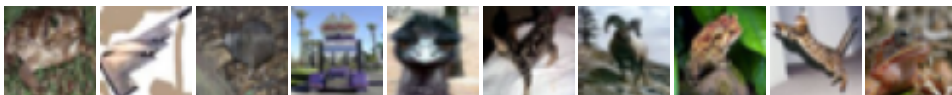

0.172 0.174 0.175 0.172 0.167 0.173 0.177 0.174 0.176 0.176

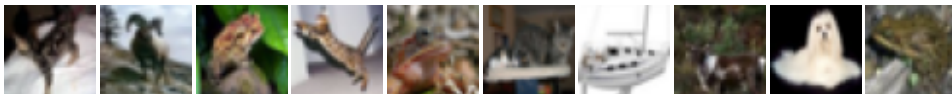

Supplement: supplementary_material [file attachment]

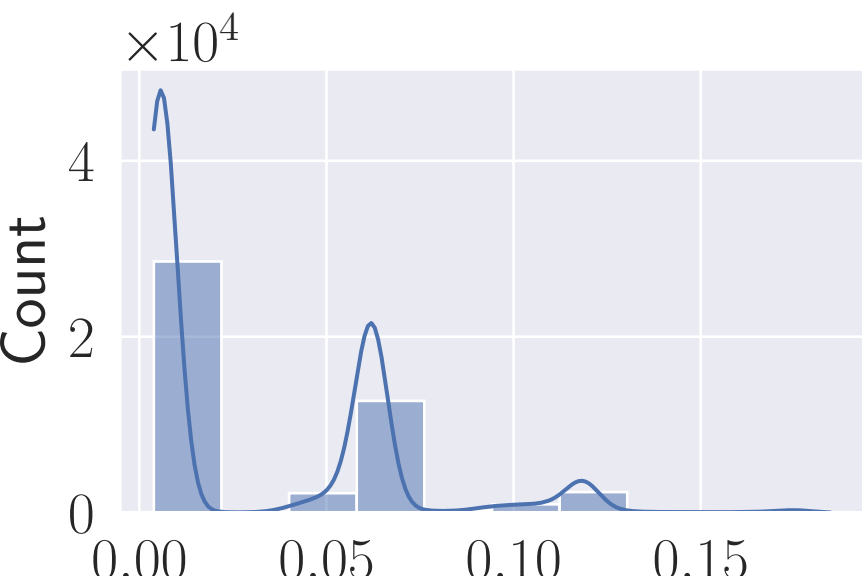

Supplement: supplementary_material [file attachment]

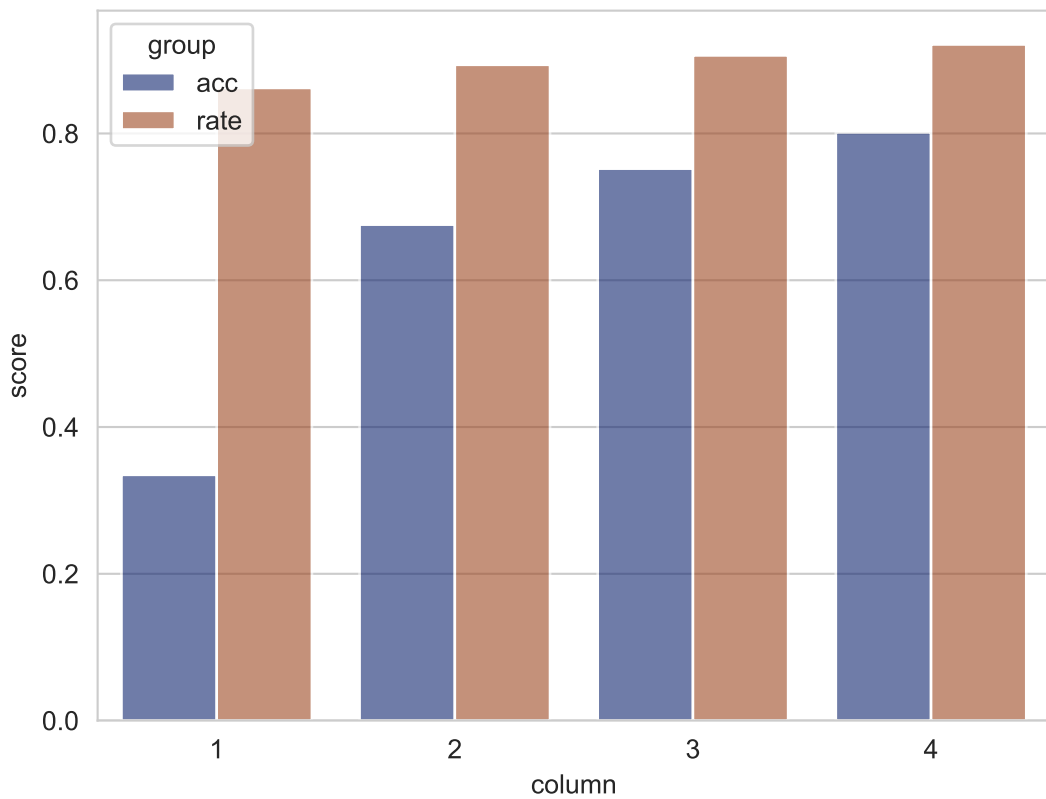

Supplement: supplementary_material [file attachment]

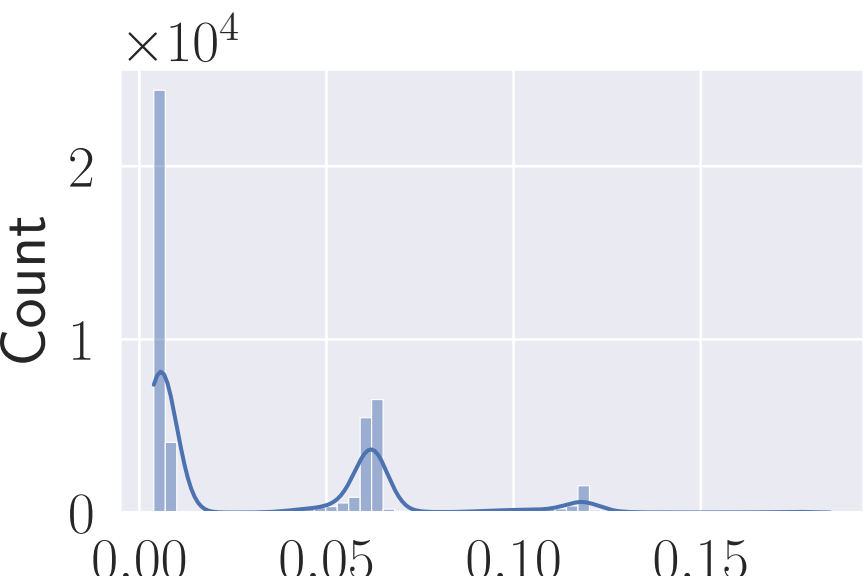

Supplement: supplementary_material [file attachment]

5.09e-03

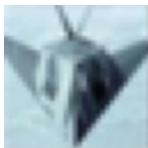

5.07e-03

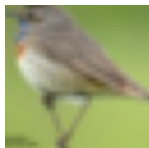

4.00e-03

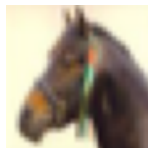

4.97e-03

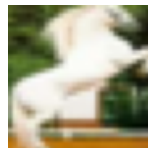

4.40e-03

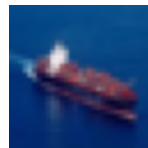

5.01e-03

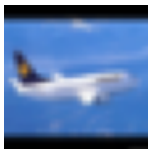

5.21e-03

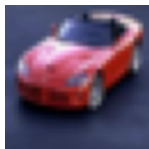

5.36e-03

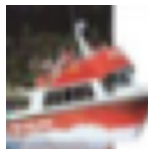

5.35e-03

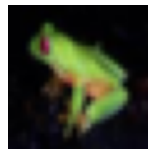

5.24e-03

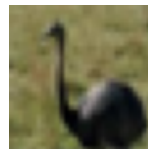

1.76e-01

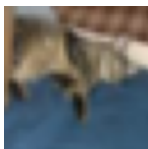

1.76e-01

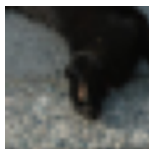

1.77e-01

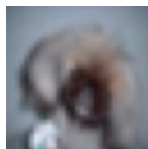

1.76e-01

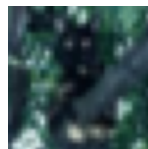

1.77e-01

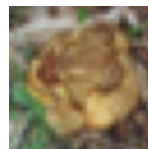

1.39e-01

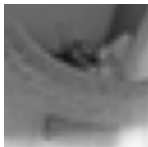

1.78e-01

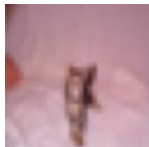

1.76e-01

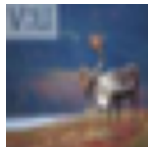

1.77e-01

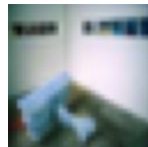

1.76e-01

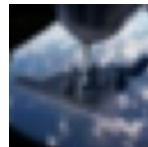

Supplement: supplementary_material [file attachment]
